# Supplementary material
Source: PubMed Central journal article supplement (PMC7769164)

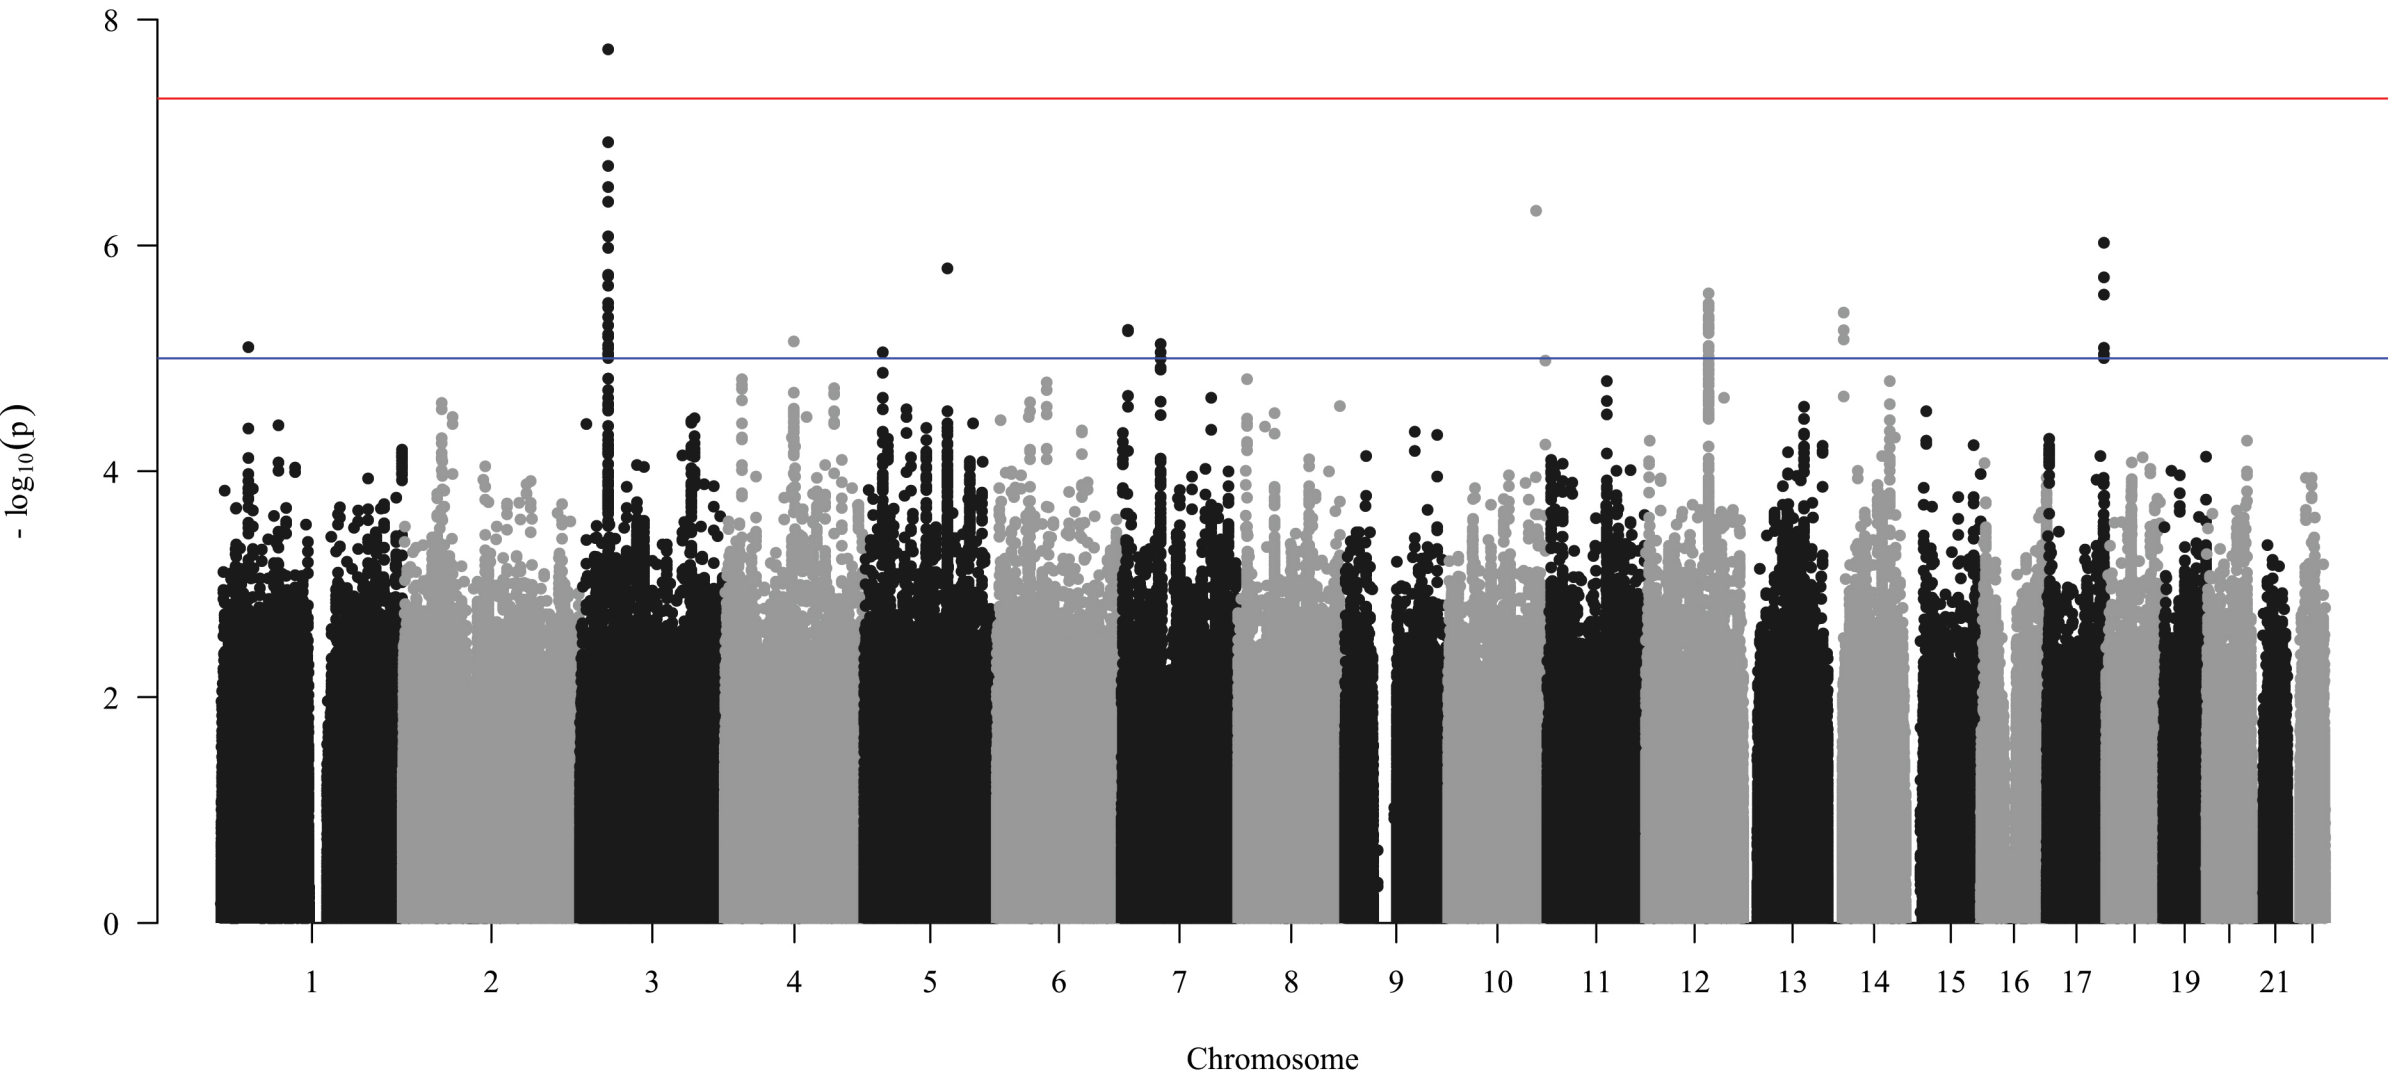

Supplement: NIHMS1652094-supplement-alz12128-sup-0001-SuppMatS1.pdf [file NIHMS1652094-supplement-alz12128-sup-0001-SuppMatS1.pdf]

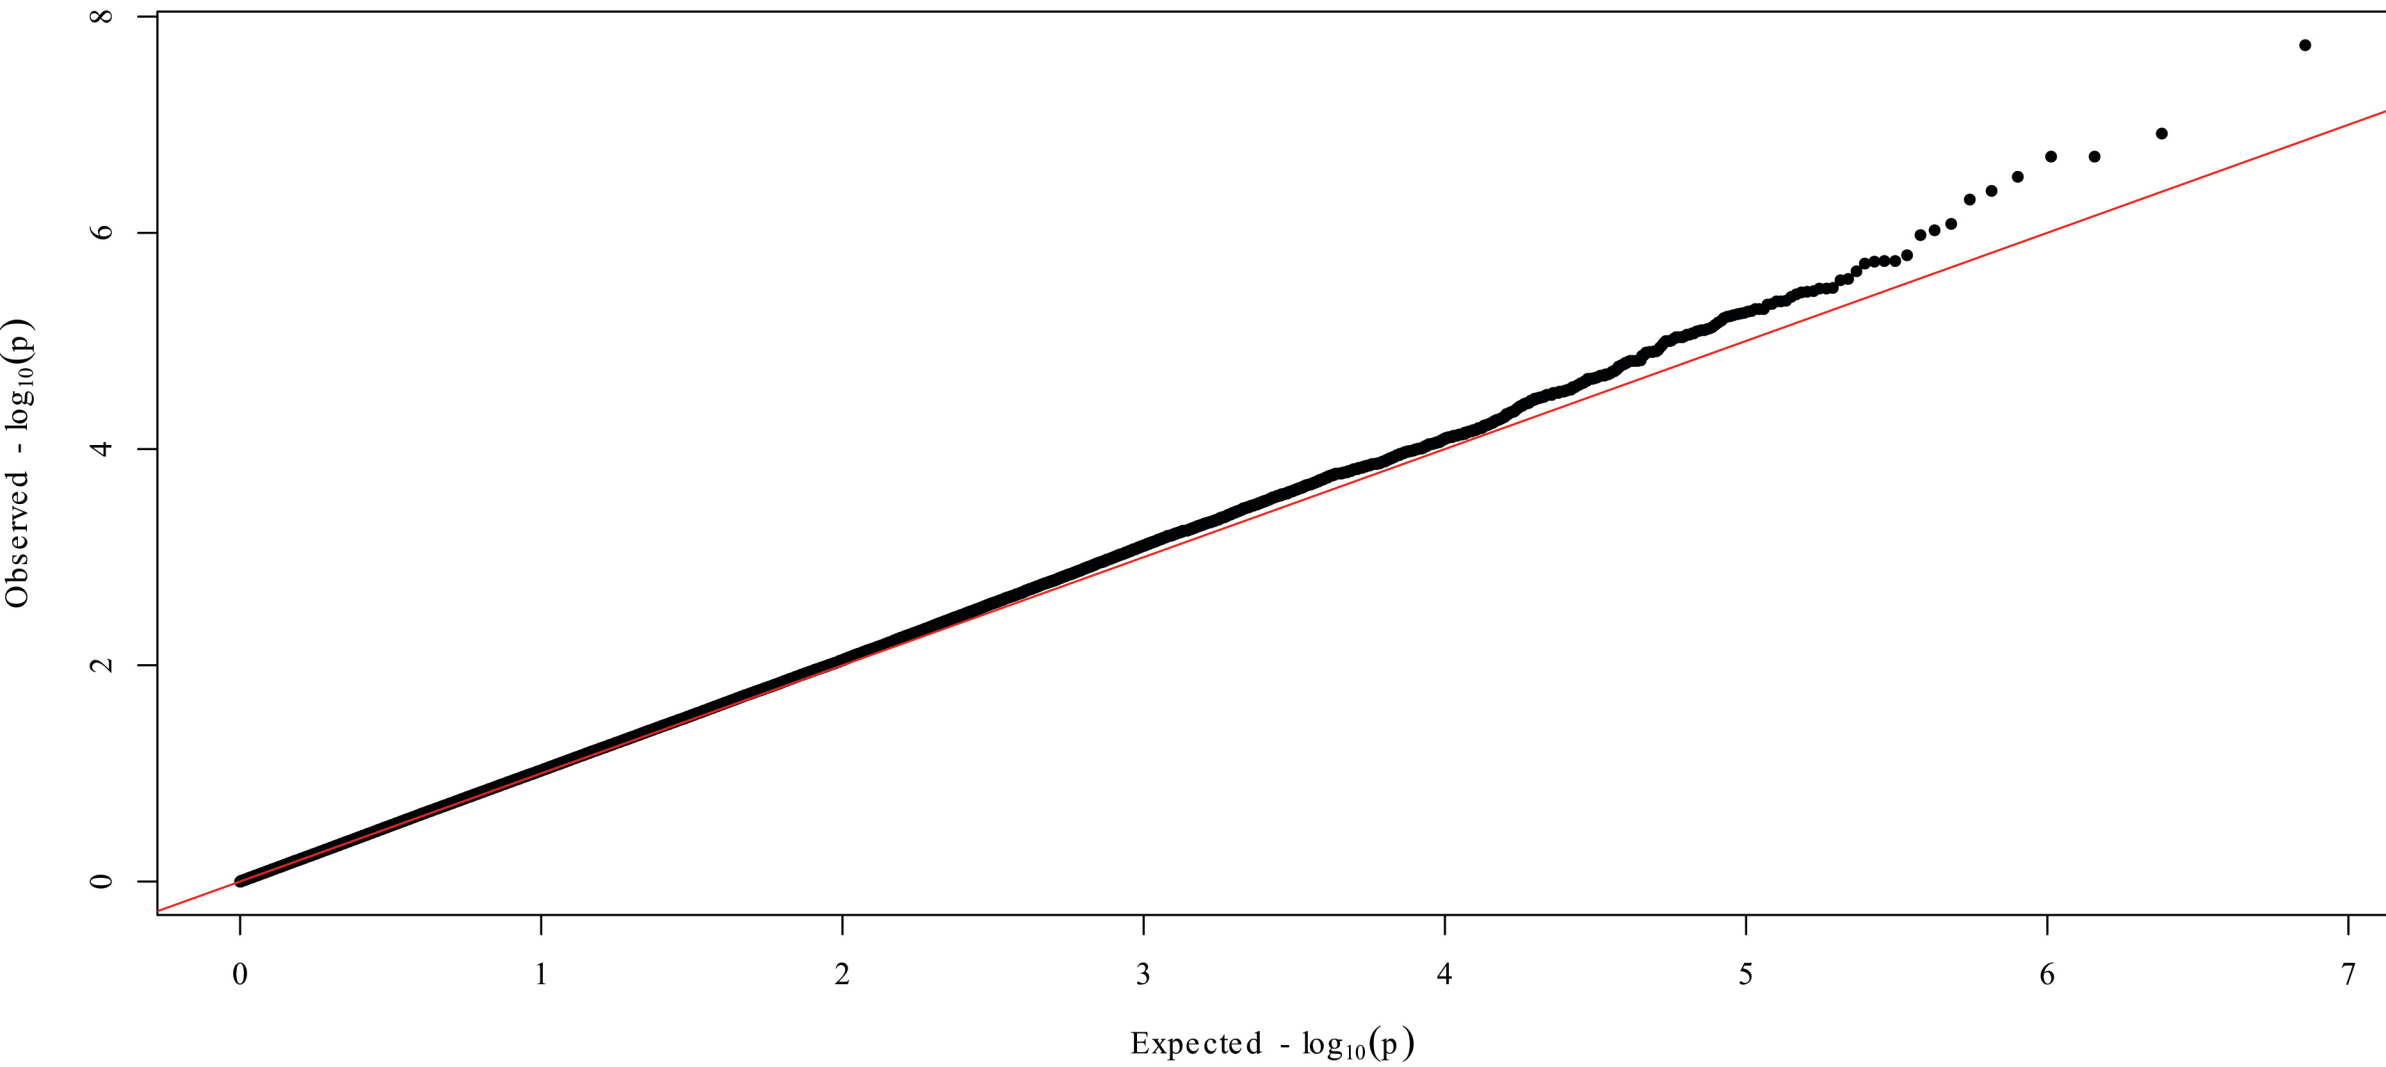

Supplement: NIHMS1652094-supplement-alz12128-sup-0002-SuppMatS2.pdf [file NIHMS1652094-supplement-alz12128-sup-0002-SuppMatS2.pdf]
